# Supplementary material
Source: Springer Nature journal article supplement (https://www.springermedizin.de/resource/supplementary/13063_2013_1549_MOESM4_ESM.pdf/9620270)
Supplement: MOESM4 [file 9620270]

|                                              | STUDY PERIOD |            |                                                                                   |   |           |
|----------------------------------------------|--------------|------------|-----------------------------------------------------------------------------------|---|-----------|
|                                              | Enrolment    | Allocation | Post-allocation                                                                   |   | Close-out |
| TIMEPOINT*                                   | -2           | 0          | 4                                                                                 | 8 | 16        |
| <b>ENROLMENT:</b>                            |              |            |                                                                                   |   |           |
| Eligibility screen                           | X            |            |                                                                                   |   |           |
| Informed consent                             | X            |            |                                                                                   |   |           |
| <i>Blood test and X-ray</i>                  | X            |            |                                                                                   | X |           |
| Allocation                                   |              | X          |                                                                                   |   |           |
| <b>INTERVENTIONS:</b>                        |              |            |                                                                                   |   |           |
| <i>MZRW+placebo Senna</i>                    |              |            |  |   |           |
| <i>Senna+placebo MZRW</i>                    |              |            |  |   |           |
| <i>Placebo MZRW+Placebo Senna</i>            |              |            |  |   |           |
| <b>ASSESSMENTS:</b>                          |              |            |                                                                                   |   |           |
| <i>Bristol stool scale</i>                   | X            | X          | X                                                                                 | X | X         |
| <i>TCM questionnaire</i>                     | X            |            |                                                                                   | X | X         |
| <i>Self-scoring of constipation symptoms</i> | X            | X          | X                                                                                 | X | X         |

\*According to SPIRIT 2013 Statement: Defining Standard Protocol Items for Clinical Trials
